# Supplementary material for: Enhancing Electrocatalytic Semihydrogenation of Alkynes via Weakening Alkene Adsorption over Electron-Depleted Cu Nanowires
Source: PubMed Central journal article supplement (PMC11487759; doi:10.1021/acsnanoscienceau.4c00030), 2024-08-08
Supplement: ng4c00030_si_001.pdf [file ng4c00030_si_001.pdf]

# SUPPORTING INFORMATION

## **Enhancing Electrocatalytic Semihydrogenation of Alkynes via Weakening Alkene Adsorption over Electron-depleted Cu Nanowires**

Dan Luo,<sup>a,+</sup> Zhiheng Xie,<sup>b,+</sup> Shuangqun Chen,<sup>a</sup> Tianyi Yang,<sup>a</sup> Yalin Guo,<sup>\*,a</sup> Ying  
Liu,<sup>a</sup> Zhouhao Zhu,<sup>b</sup> Liyong Gan<sup>\*,b</sup> Lingmei Liu,<sup>a</sup> and Jianfeng Huang<sup>\*,a</sup>

<sup>a</sup> State Key Laboratory of Coal Mine Disaster Dynamics and Control, Institute of Advanced Interdisciplinary Studies, School of Chemistry and Chemical Engineering, Chongqing University, Chongqing 400044, China

<sup>b</sup> College of Physics and Center of Quantum Materials and Devices, Chongqing University, Chongqing 401331, China

<sup>+</sup> These authors contributed equally to this work.

E-mail: [guoyalin2022@cqu.edu.cn](mailto:guoyalin2022@cqu.edu.cn), [ganly@cqu.edu.cn](mailto:ganly@cqu.edu.cn), [jianfeng.huang@cqu.edu.cn](mailto:jianfeng.huang@cqu.edu.cn)

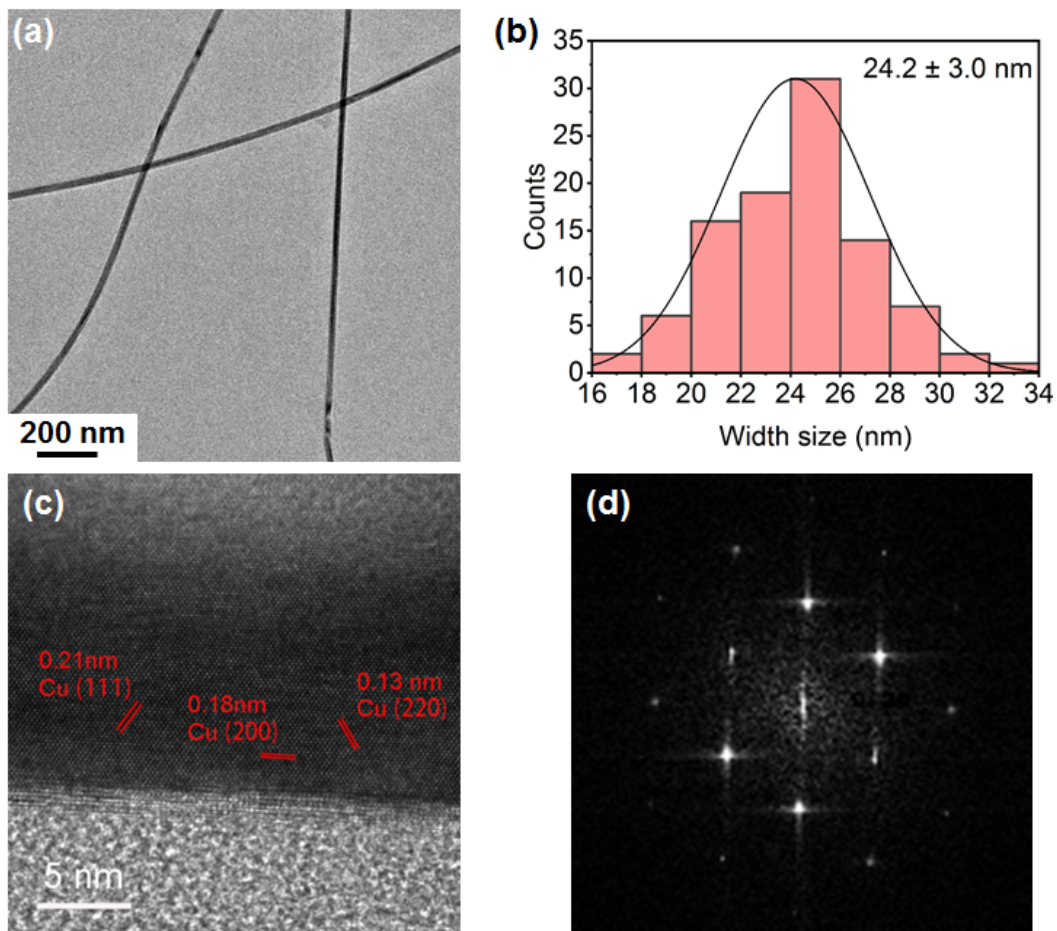

**Figure S1.** (a) TEM image and (b) width distribution of the Cu NWs with an average diameter of  $24.2 \pm 3.0$  nm; (c, d) HRTEM and the corresponding FFT of one Cu NW.

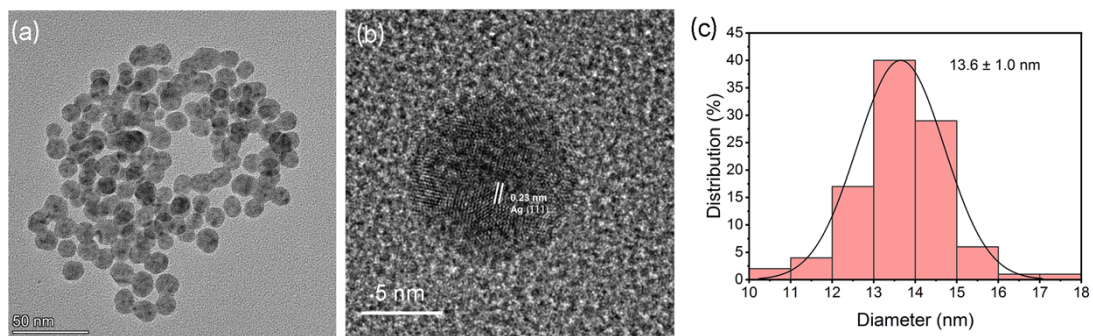

**Figure S2.** (a) TEM image, (b) HRTEM, and (c) size distribution of the Ag NPs with an average diameter of 13.6 nm.

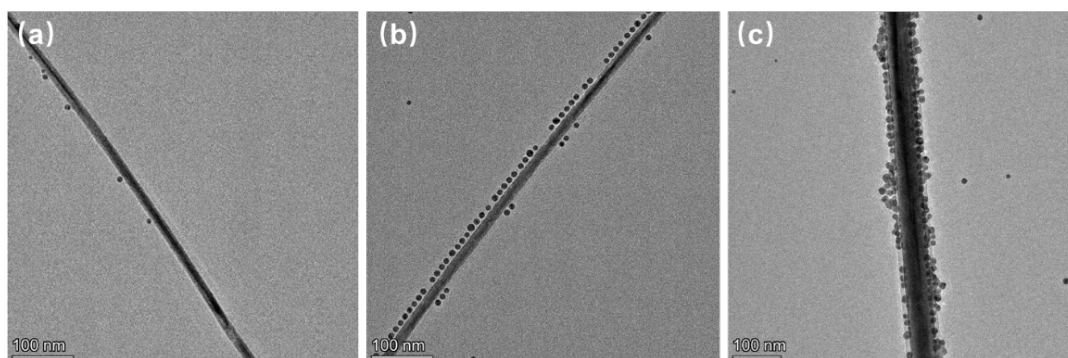

**Figure S3.** TEM images of (a)  $\text{Cu}_{99.3}\text{NW}@\text{Ag}_{0.7}\text{NPs}$ , (b)  $\text{Cu}_{96}\text{NW}@\text{Ag}_4\text{NPs}$  and (c)  $\text{Cu}_{90}\text{NW}@\text{Ag}_{10}\text{NPs}$  hybrids.

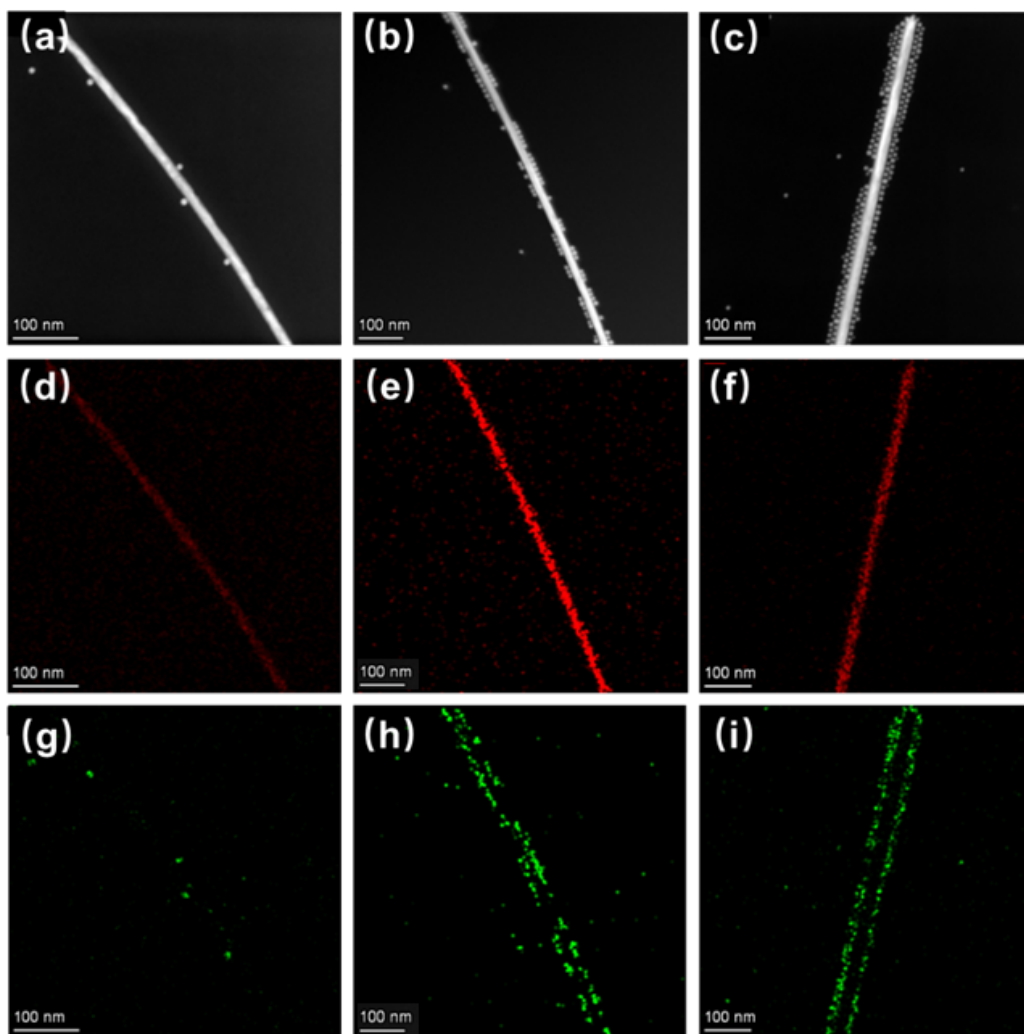

**Figure S4.** HAADF-STEM images and the corresponding EDX elemental mappings of Cu (red) and Ag (green) of the CuNW@AgNPs hybrids with three different Cu/Ag ratios: (a) Cu<sub>99.3</sub>NW@Ag<sub>0.7</sub>NPs, (b) Cu<sub>96</sub>NW@Ag<sub>4</sub>NPs and (c) Cu<sub>90</sub>NW@Ag<sub>10</sub>NPs hybrids.

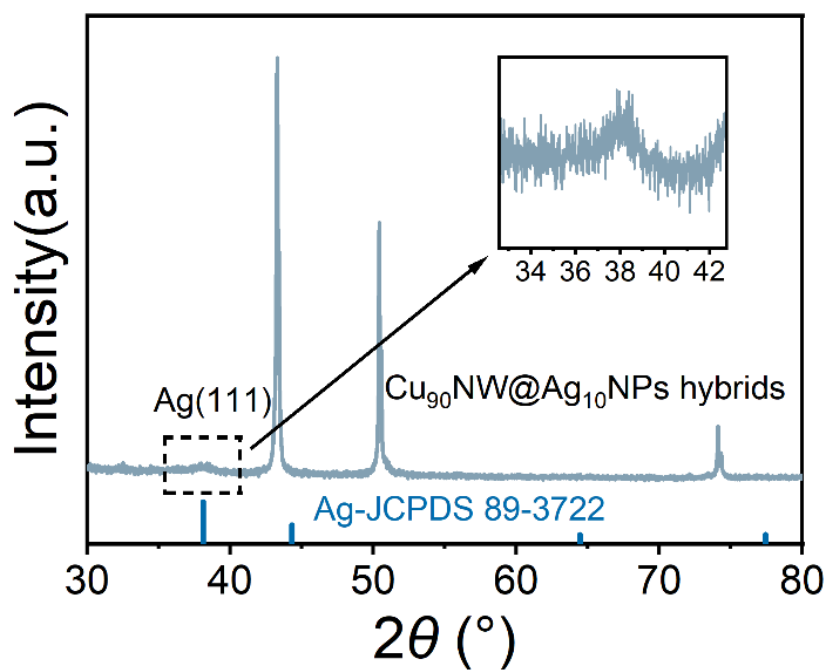

**Figure S5.** XRD pattern of Cu<sub>90</sub>NW@Ag<sub>10</sub>NPs hybrids, with the boxed region enlarged in the inset, showing the diffraction peak from the Ag(111) planes.

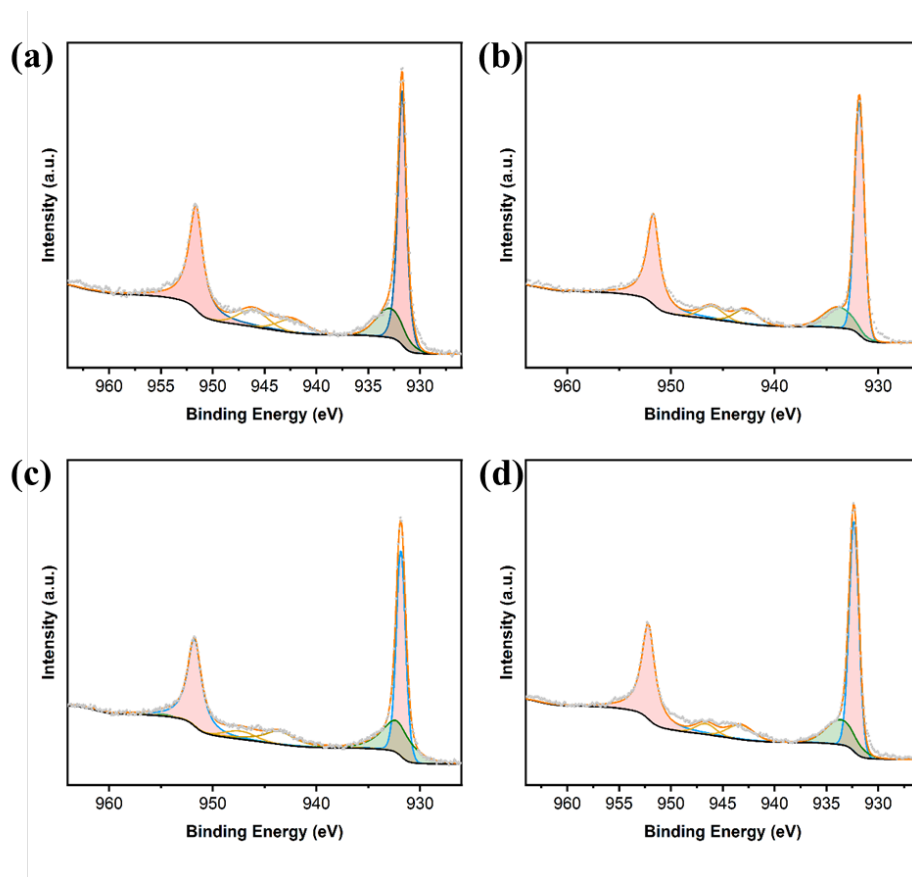

**Figure S6.** XPS Cu 2p spectra of (a) Cu NWs, (b) Cu<sub>99.3</sub>NW@Ag<sub>0.7</sub>NPs, (c) Cu<sub>96</sub>NW@Ag<sub>4</sub>NPs, and (d) Cu<sub>90</sub>NW@Ag<sub>10</sub>NPs hybrids.

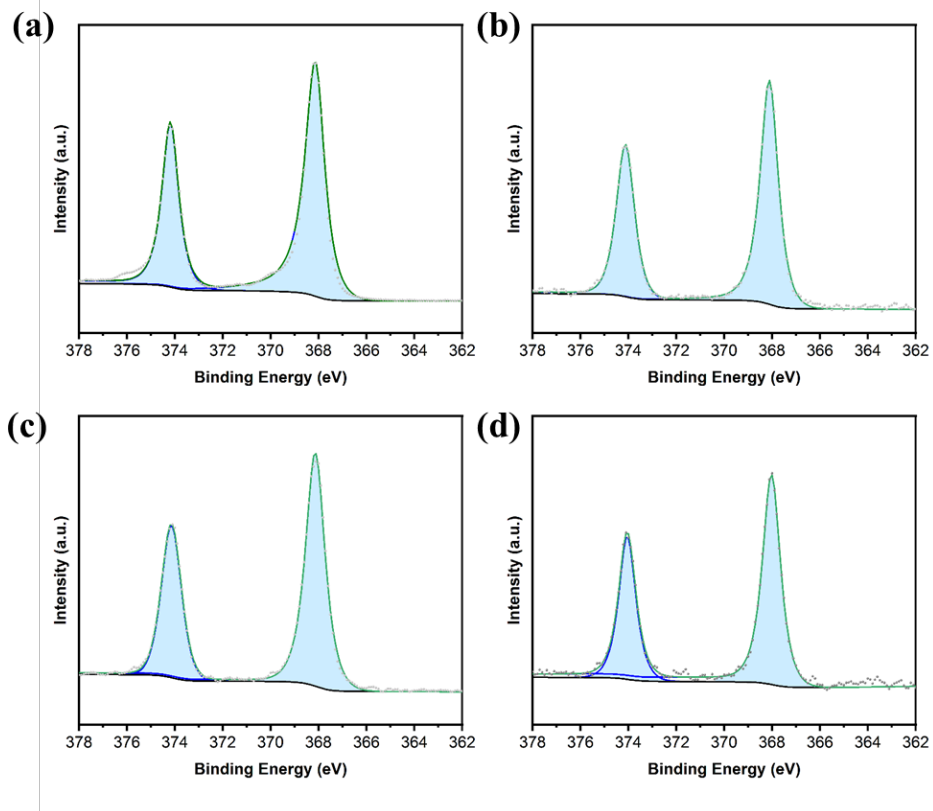

**Figure S7.** XPS Ag 3d spectra of (a) Ag NPs, (b)  $\text{Cu}_{99.3}\text{NW}@Ag_{0.7}\text{NPs}$ , (c)  $\text{Cu}_{96}\text{NW}@Ag_4\text{NPs}$ , and (d)  $\text{Cu}_{90}\text{NW}@Ag_{10}\text{NPs}$  hybrids.



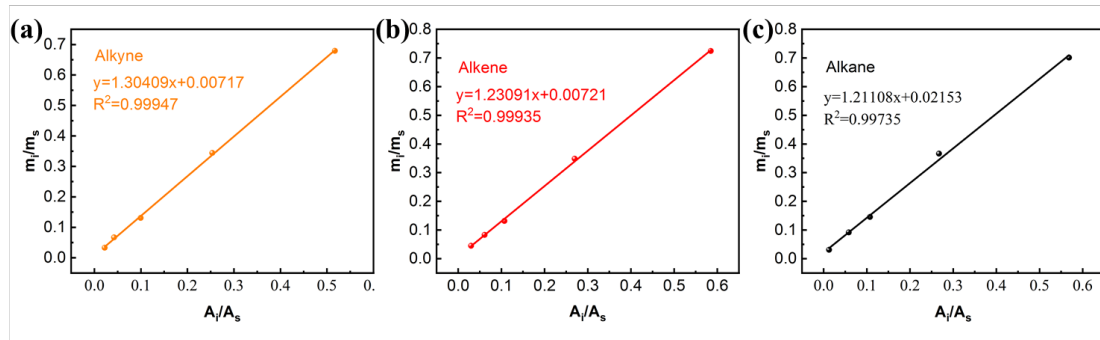

**Figure S8.** Standard curves used to quantify (a) alkynes (EYA), (b) alkenes (VYA), and (c) alkanes (4-ethylaniline).

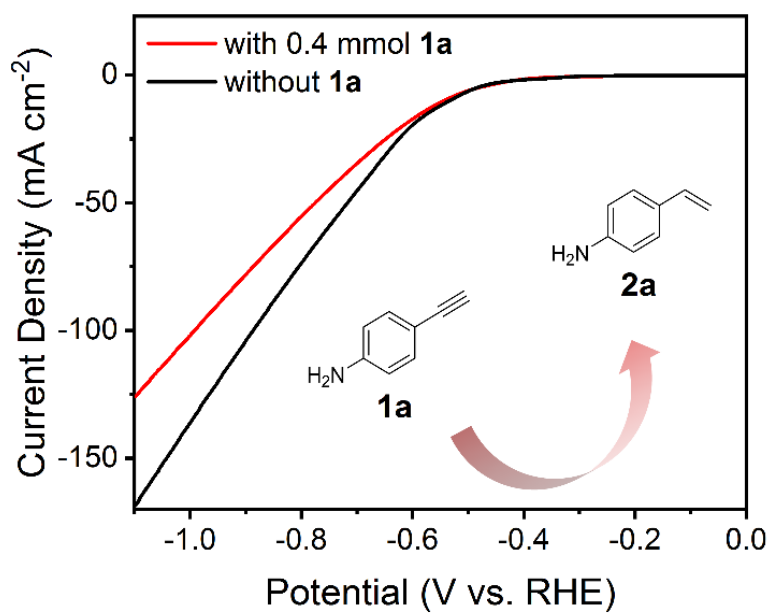

**Figure S9.** LSV curves of Cu<sub>96</sub>NW@Ag<sub>4</sub>NPs in 1.0 M KOH solution [dioxane/H<sub>2</sub>O, 2/5 (v/v)] at a scan rate of 5 mV s<sup>-1</sup> with and without 0.4 mmol of EYA.

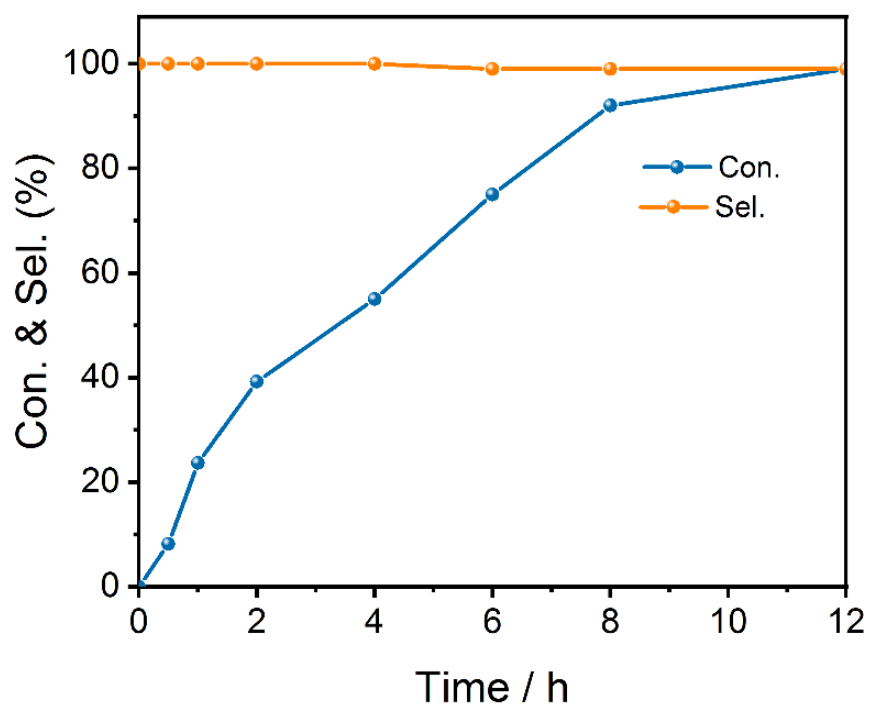

**Figure S10.** Time-dependent conversions (Con.) of EYA and selectivity (Sel.) for VYA over Cu NWs at  $-0.75$  V.

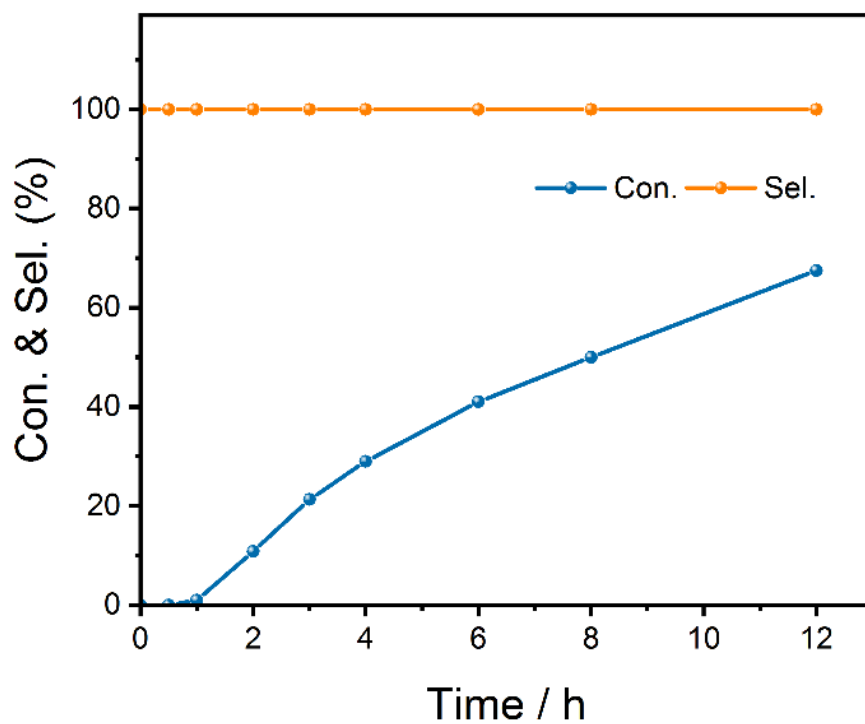

**Figure S11.** Time-dependent conversions (Con.) of EYA and selectivity (Sel.) for VYA over Ag NPs at  $-0.75$  V.

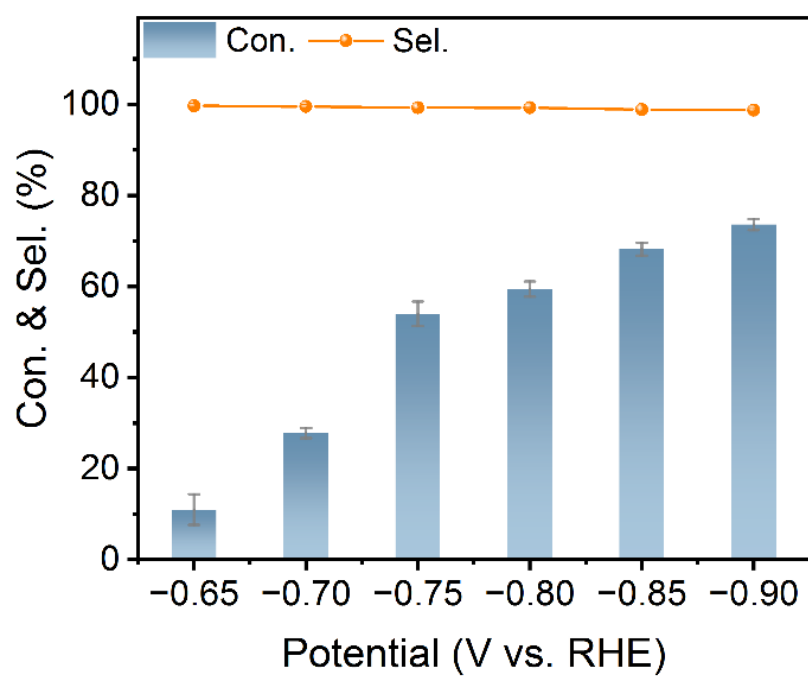

**Figure S12.** Potential-dependent conversions (Con.) of EYA and selectivity (Sel.) for VYA over Cu NWs within 4 h.

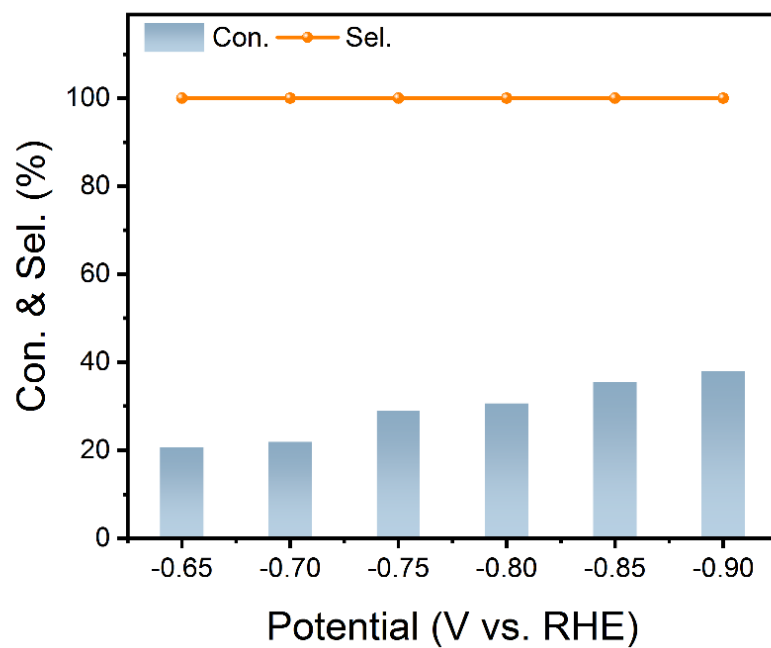

**Figure S13.** Potential-dependent conversions (Con.) of EYA and selectivity (Sel.) for VYA over Ag NPs within 4 h.

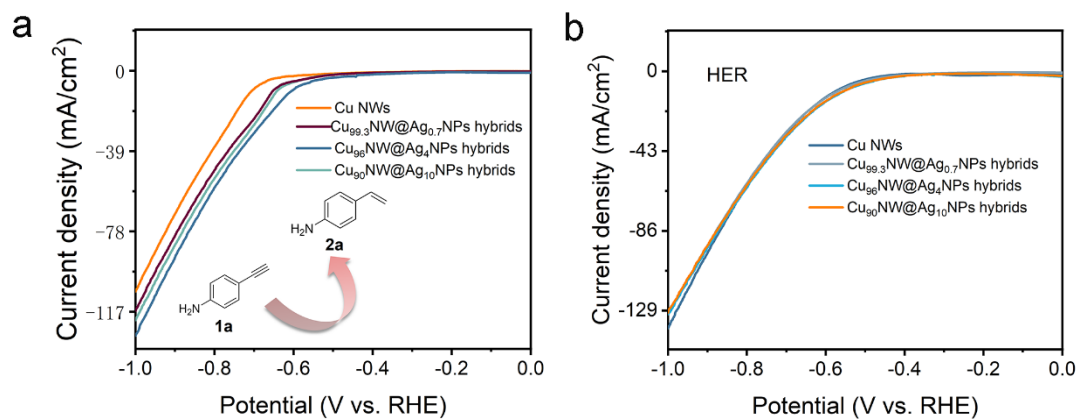

**Figure S14.** LSV curves of Cu NWs, Cu<sub>99.3</sub>NW@Ag<sub>0.7</sub>NPs, Cu<sub>96</sub>NW@Ag<sub>4</sub>NPs, and Cu<sub>90</sub>NW@Ag<sub>10</sub>NPs in 1.0 M KOH solution [dioxane/H<sub>2</sub>O, 2/5 (v/v)] at a scan rate of 5 mV s<sup>-1</sup> (a) with and (b) without 0.4 mmol of EYA.

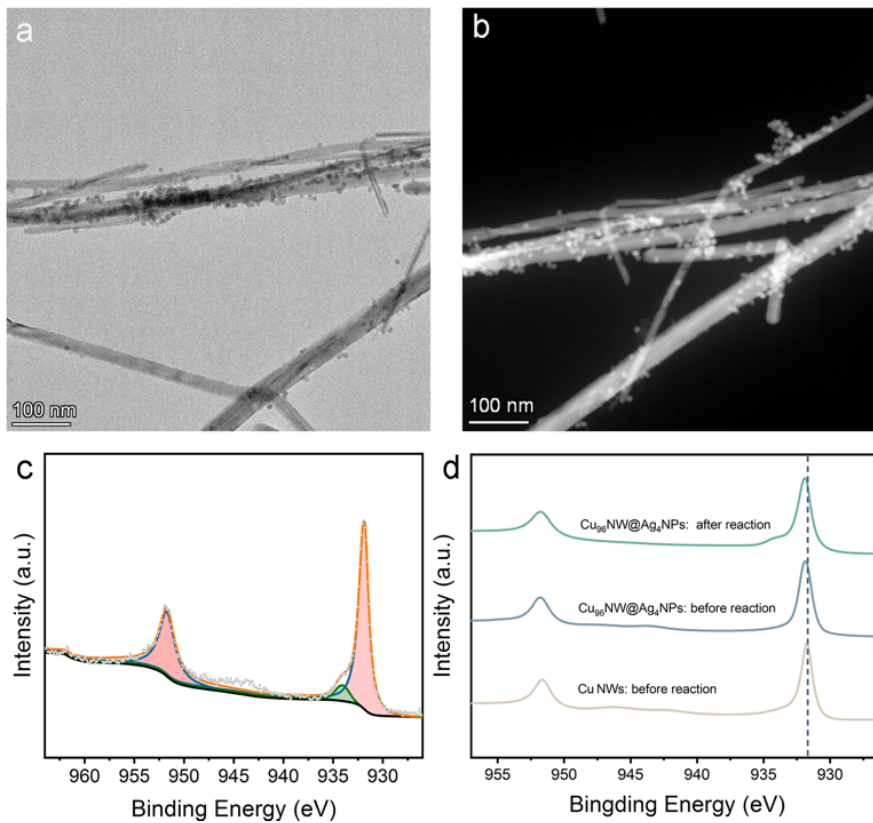

**Figure S15.** (a) TEM and (b) HAADF-STEM image (c) XPS Cu 2p spectra of Cu<sub>96</sub>NW@Ag<sub>4</sub>NPs hybrids after 4h's electrolysis at  $-0.75$  V vs. RHE, (d) comparison between XPS Cu 2p spectra of Cu<sub>96</sub>NW@Ag<sub>4</sub>NPs hybrids before and after reaction and XPS Cu 2p spectra of Cu NWs.



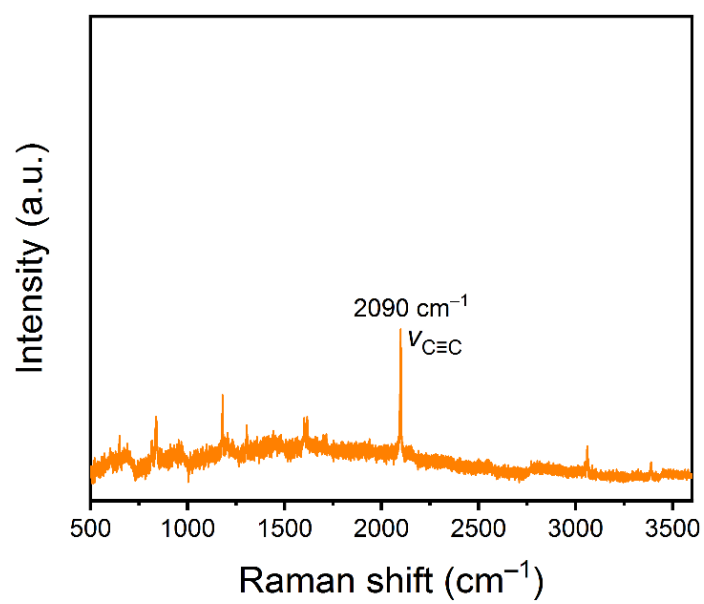

**Figure S16.** Raman spectra of 4-Ethynylaniline (EYA) powders.

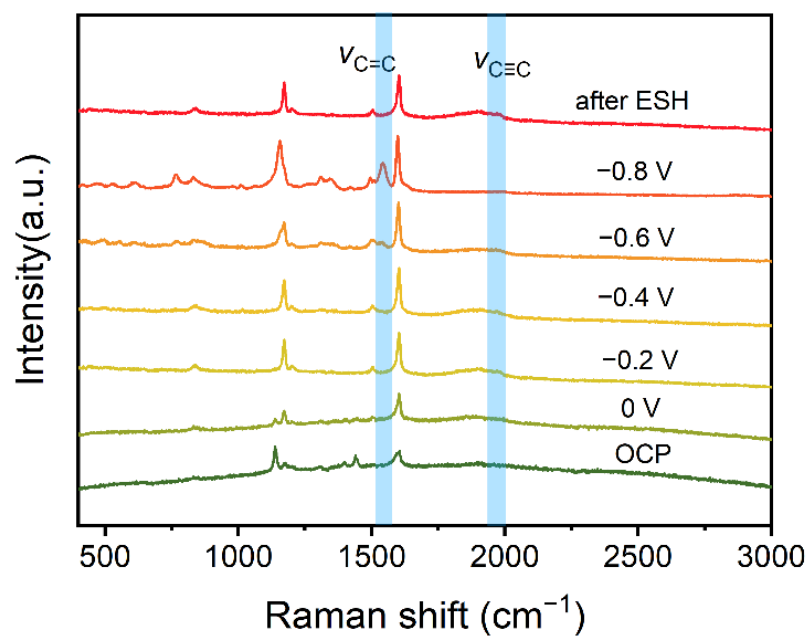

**Figure S17.** In situ potential-dependent Raman spectra measured on Cu NWs.

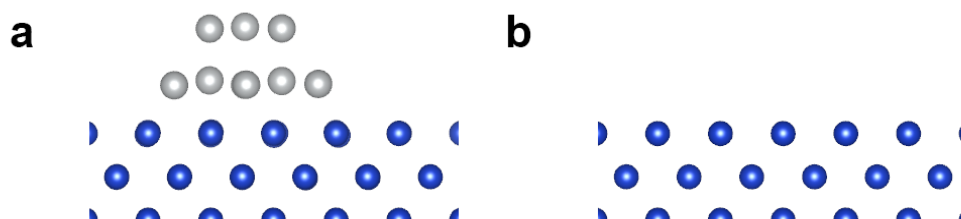

**Figure S18.** Theoretical calculation models of catalysts: (a) CuNW@AgNPs hybrids and (b) Cu NWs. Cu and Ag atoms are shown as blue and white spheres, respectively.

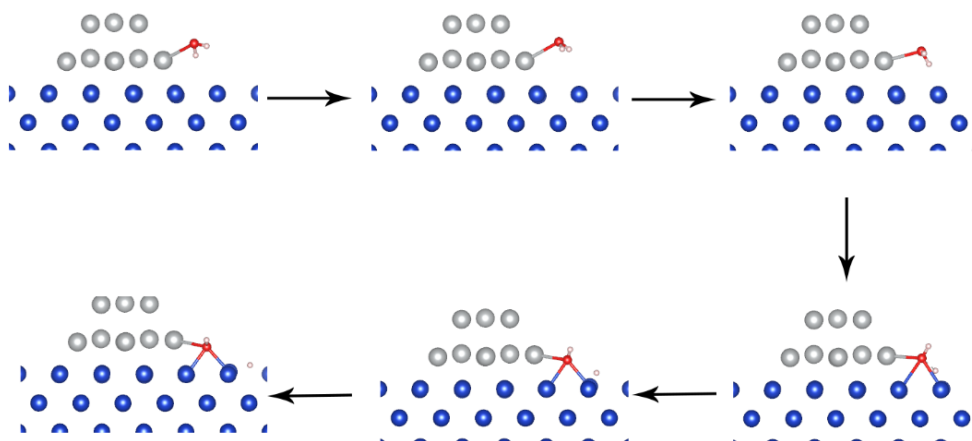

**Figure S19.** Transformation of adsorption configurations in H<sub>2</sub>O decomposition on CuNW@AgNPs hybrids surface.

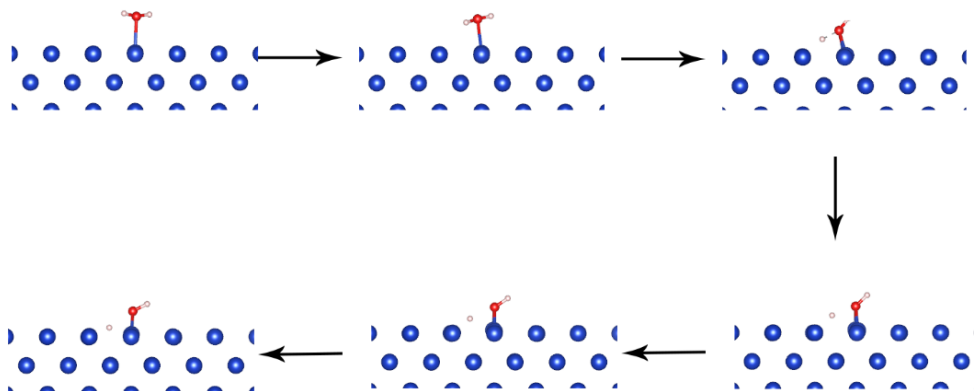

**Figure S20.** Transformation of adsorption configurations in H<sub>2</sub>O decomposition on Cu NWs surface.

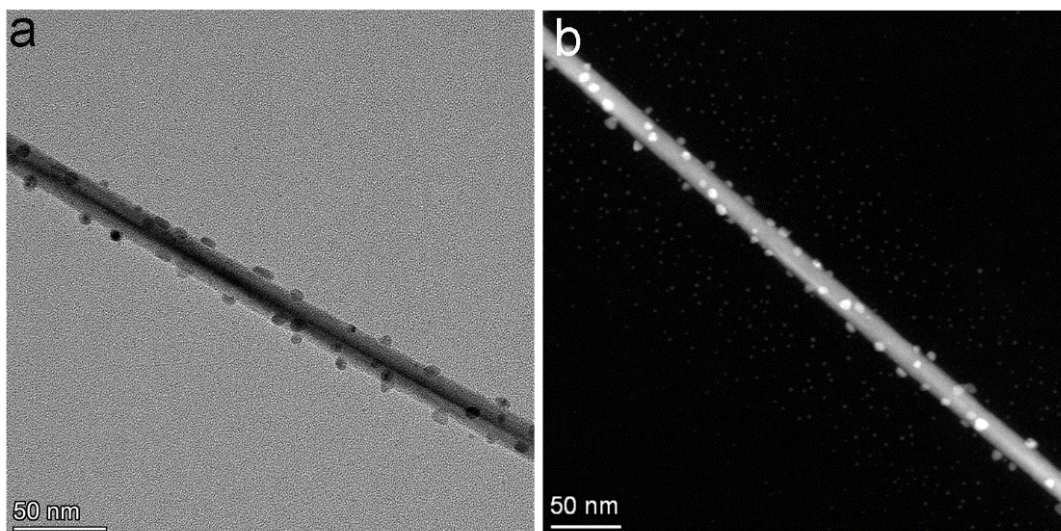

**Figure S21.** (a) TEM image and (b) HAADF-STEM image of CuNW@AgNPs-GRR bimetallic catalysts fabricated by the galvanic replacement reaction (GRR) method with an atomic ratio: Cu/Ag = 96.4/3.6.

Note: CuNW@AgNPs-GRR hybrids were synthesized using the following method. The as-prepared Cu NWs were evenly dispersed in 10 mL of oleylamine through sonication. Simultaneously, 20 mg of AgNO<sub>3</sub> were dissolved in 10 mL of oleylamine at 30°C through sonication. The two solutions were then mixed to initiate a galvanic replacement reaction (GRR) at 60°C for 2 hours. Afterward, the solution was cooled to room temperature, and the catalysts were washed three times with an ethanol/hexane mixture (1:1 volume ratio). The CuNW@AgNPs-GRR hybrids were collected by centrifugation at 9500 rpm for 5 minutes and dried in a vacuum oven at room temperature for 4 hours.

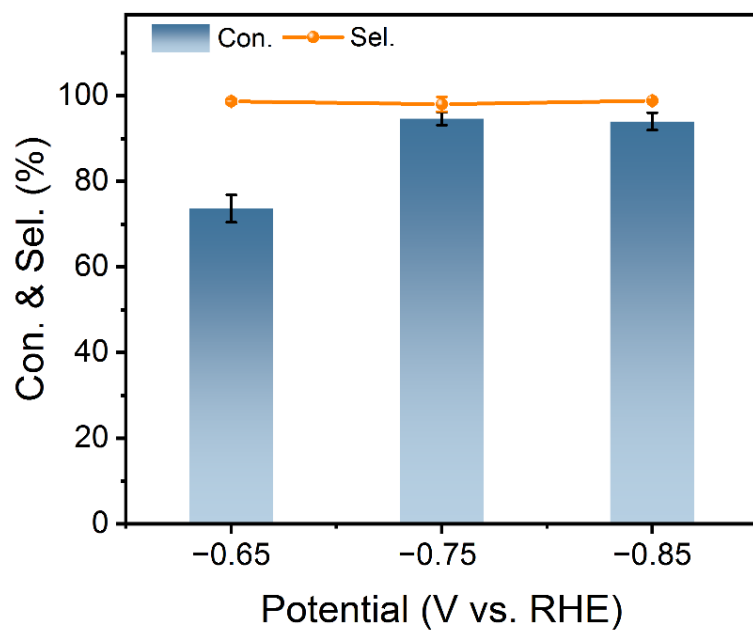

**Figure S22.** Potential-dependent conversion (Con.) of EYA and selectivity (Sel.) for VYA over CuNW@AgNPs-GRR bimetallic catalysts.
